# Supplementary material for: Structure-Based Virtual Screening of Novel Natural Alkaloid Derivatives as Potential Binders of h-telo and c-myc DNA G-Quadruplex Conformations
Source: PubMed Central journal article supplement (PMC6272608; doi:10.3390/molecules20010206), 2014-12-24
Supplement: molecules-20-00206-s001.pdf [file molecules-20-00206-s001.pdf]

# Supplementary Materials

## Table of Contents

Table S1. Table of 2D chemical structure, G-score and MM-GBSA values of the 69 best hits obtained after docking simulations against *h-telo* and *c-myc* G4 structures.

Figure S1. Best redocking poses and RMSd values obtained using the Glide-SP algorithm for berberine and quindoline against 3R6R (*h-telo*) and 2L7V (*c-myc*) receptors, respectively. Redocked poses are displayed as green carbon sticks, while crystallographic conformation is shown as cyan carbon sticks.

**Table S1.** 2D chemical structure, G-score and MM-GBSA values of the 69 best hits, obtained after docking simulations against *h-telo* and *c-myc* G4 structures. The CID ID indicates the identifier for the test compounds; G-score and MM-GBSA values are expressed in kcal/mol. The ligands marked with the asterisk belong to the final selection of compounds currently under experimental investigations.

| Berberine Analogues |                                                                                     |               |         |              |         |                                             |
|---------------------|-------------------------------------------------------------------------------------|---------------|---------|--------------|---------|---------------------------------------------|
| CID ID              | 2D Chemical Structure                                                               | <i>h-telo</i> |         | <i>c-myc</i> |         | Anticancer Activity and if Available Target |
|                     |                                                                                     | G-Score       | MM/GBSA | G-Score      | MM/GBSA |                                             |
| 10269105 *          | 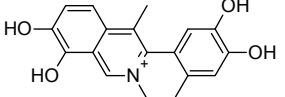   | -6.77         | -53.64  | -8.60        | -43.71  | Antitumor [1]                               |
| 71496902 *          |    | -6.88         | -46.76  | -8.44        | -44.15  | -                                           |
| 10133114            |    | -6.13         | -45.92  | -8.05        | -43.18  | Antitumor [1]                               |
| 68426959            |   | -6.15         | -43.18  | -8.32        | -38.01  | Phospholipase A2 inhibitor [2]              |
| 21417729 *          |  | -7.36         | -42.23  | -8.27        | -36.21  | Antitumor [3]                               |
| 9880653 *           |  | -6.37         | -40.41  | -9.06        | -48.23  | Rac GTPases inhibitor [4]                   |

Table S1. Cont.

| Berberine Analogues |                                                                                     |               |         |              |         | Anticancer Activity and if Available Target |
|---------------------|-------------------------------------------------------------------------------------|---------------|---------|--------------|---------|---------------------------------------------|
| CID ID              | 2D Chemical Structure                                                               | <i>h-telo</i> |         | <i>c-myc</i> |         |                                             |
|                     |                                                                                     | G-Score       | MM/GBSA | G-Score      | MM/GBSA |                                             |
| 49870985 *          | 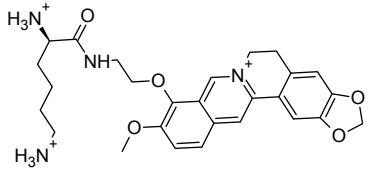   | -10.05        | -39.87  | -9.49        | -49.12  | Calf thymus (CT) DNA binder [5]             |
| 21417482 *          |    | -6.83         | -38.67  | -8.38        | -38.71  | Antitumor [3]                               |
| 11618402 *          |    | -6.43         | -38.42  | -9.34        | -54.37  | Rac GTPases inhibitor [4]                   |
| 21417576 *          |    | -6.59         | -36.50  | -8.89        | -32.52  | Antitumor [6]                               |
| 3939583 *           |   | -7.17         | -35.16  | -8.94        | -41.29  | -                                           |
| 58064859 *          |  | -6.46         | -35.13  | -8.59        | -34.37  | -                                           |

Table S1. Cont.

| Berberine Analogues |                                                                                     |               |         |              |         | Anticancer Activity and if Available Target |
|---------------------|-------------------------------------------------------------------------------------|---------------|---------|--------------|---------|---------------------------------------------|
| CID ID              | 2D Chemical Structure                                                               | <i>h-telo</i> |         | <i>c-myc</i> |         |                                             |
|                     |                                                                                     | G-Score       | MM/GBSA | G-Score      | MM/GBSA |                                             |
| 71165335            | 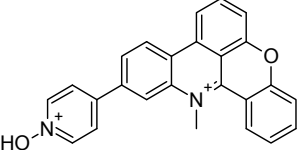   | -7.30         | -34.72  | -9.73        | -51.64  | Telomerase inhibitor [7]                    |
| 10358881 *          |    | -6.03         | -34.52  | -8.67        | -49.48  | -                                           |
| 21417681 *          |    | -6.55         | -34.47  | -9.22        | -32.79  | -                                           |
| 29146231 *          |    | -7.68         | -34.26  | -9.06        | -38.74  | -                                           |
| 68071758 *          |   | -7.21         | -34.04  | -8.97        | -49.92  | -                                           |
| 25164618 *          |  | -6.29         | -33.82  | -9.01        | -43.44  | Antitumor [8]                               |
| 72323 *             |  | -6.29         | -33.40  | -8.71        | -39.71  | Antitumor [9]                               |

Table S1. Cont.

| Berberine Analogues |                                                                                     |               |         |              |         | Anticancer Activity and if Available Target |
|---------------------|-------------------------------------------------------------------------------------|---------------|---------|--------------|---------|---------------------------------------------|
| CID ID              | 2D Chemical Structure                                                               | <i>h-telo</i> |         | <i>c-myc</i> |         |                                             |
|                     |                                                                                     | G-Score       | MM/GBSA | G-Score      | MM/GBSA |                                             |
| 21417634            | 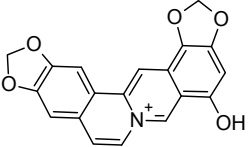   | -6.06         | -33.30  | -8.06        | -31.81  | -                                           |
| 44583341 *          |    | -6.20         | -33.04  | -8.11        | -45.42  | G4 binder [10,11]                           |
| 53343538            |    | -6.71         | -32.78  | -8.52        | -34.01  | -                                           |
| 21417462 *          |   | -6.65         | -32.13  | -9.14        | -49.69  | -                                           |
| 70848286            |  | -6.36         | -32.10  | -8.56        | -41.83  | -                                           |
| 66602686            |  | -6.53         | -31.70  | -8.87        | -34.34  | -                                           |

Table S1. Cont.

| Berberine Analogues |                                                                                     |               |         |              |         | Anticancer Activity and if Available Target |
|---------------------|-------------------------------------------------------------------------------------|---------------|---------|--------------|---------|---------------------------------------------|
| CID ID              | 2D Chemical Structure                                                               | <i>h-telo</i> |         | <i>c-myc</i> |         |                                             |
|                     |                                                                                     | G-Score       | MM/GBSA | G-Score      | MM/GBSA |                                             |
| 45483073            | 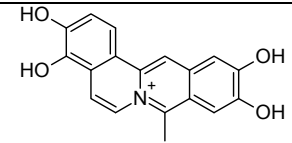   | -6.83         | -31.44  | -9.22        | -43.96  | Rac GTPases inhibitor [12]                  |
| 24839791            |    | -6.15         | -31.12  | -8.49        | -41.03  | -                                           |
| 21417600 *          |    | -6.98         | -30.95  | -8.86        | -48.51  | -                                           |
| 24200207            |   | -6.09         | -30.81  | -9.13        | -38.58  | Antitumor [13]                              |
| 21417591 *          |  | -6.86         | -30.42  | -8.29        | -47.09  | -                                           |

Table S1. Cont.

| Berberine Analogues |                                                                                     |               |         |              |         | Anticancer Activity and if Available Target |
|---------------------|-------------------------------------------------------------------------------------|---------------|---------|--------------|---------|---------------------------------------------|
| CID ID              | 2D Chemical Structure                                                               | <i>h-telo</i> |         | <i>c-myc</i> |         |                                             |
|                     |                                                                                     | G-Score       | MM/GBSA | G-Score      | MM/GBSA |                                             |
| 21417448            | 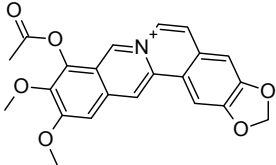   | -6.32         | -30.22  | -8.10        | -28.79  | -                                           |
| 161372              |    | -6.20         | -30.20  | -8.58        | -40.49  | Antitumor [14]                              |
| 21417712            |    | -7.25         | -30.11  | -8.47        | -35.08  | -                                           |
| 21417707            |    | -6.33         | -30.10  | -8.18        | -31.68  | -                                           |
| 71476670            |   | -6.38         | -29.98  | -8.98        | -34.24  | Telomerase inhibitor [7]                    |
| 21417594            |  | -6.50         | -29.90  | -8.22        | -31.63  | -                                           |

Table S1. Cont.

| Berberine Analogues |                                                                                     |               |         |              |         | Anticancer Activity and if Available Target |
|---------------------|-------------------------------------------------------------------------------------|---------------|---------|--------------|---------|---------------------------------------------|
| CID ID              | 2D Chemical Structure                                                               | <i>h-telo</i> |         | <i>c-myc</i> |         |                                             |
|                     |                                                                                     | G-Score       | MM/GBSA | G-Score      | MM/GBSA |                                             |
| 21417589            | 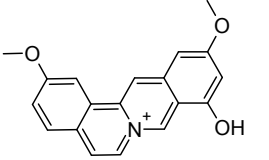   | -6.30         | -29.82  | -8.27        | -29.61  | -                                           |
| 25093287            |    | -6.28         | -29.32  | -8.27        | -32.60  | Bcl-XL Inhibitor [15]                       |
| 21417511            |    | -6.25         | -28.99  | -8.08        | -35.17  | -                                           |
| 21417657            |    | -6.84         | -28.52  | -8.18        | -37.81  | -                                           |
| 21417566            |   | -6.13         | -28.47  | -8.03        | -30.27  | -                                           |
| 68119699            |  | -6.07         | -28.17  | -8.22        | -32.10  | -                                           |



Table S1. Cont.

| Berberine Analogues |                                                                                     |               |         |              |         | Anticancer Activity and if Available Target |
|---------------------|-------------------------------------------------------------------------------------|---------------|---------|--------------|---------|---------------------------------------------|
| CID ID              | 2D Chemical Structure                                                               | <i>h-telo</i> |         | <i>c-myc</i> |         |                                             |
|                     |                                                                                     | G-Score       | MM/GBSA | G-Score      | MM/GBSA |                                             |
| 21417545            | 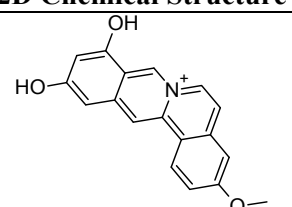   | -6.82         | -28.01  | -8.84        | -33.02  | -                                           |
| 24198806            |    | -6.53         | -27.78  | -8.24        | -40.44  | -                                           |
| 21417717            |    | -6.11         | -27.73  | -8.81        | -39.15  | -                                           |
| 24196957            |  | -6.00         | -27.45  | -8.65        | -43.45  | -                                           |
| 68119998            |  | -6.25         | -27.18  | -8.03        | -39.11  | -                                           |
| 21417624            |  | -6.05         | -26.91  | -8.99        | -29.19  | -                                           |

Table S1. Cont.

| Berberine Analogues |                                                                                     |               |         |              |         | Anticancer Activity and if Available Target |
|---------------------|-------------------------------------------------------------------------------------|---------------|---------|--------------|---------|---------------------------------------------|
| CID ID              | 2D Chemical Structure                                                               | <i>h-telo</i> |         | <i>c-myc</i> |         |                                             |
|                     |                                                                                     | G-Score       | MM/GBSA | G-Score      | MM/GBSA |                                             |
| 53343867            | 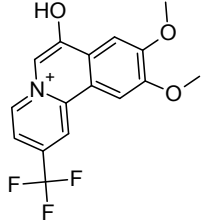   | -6.39         | -26.10  | -8.05        | -31.53  | -                                           |
| 53343540            |    | -6.70         | -25.79  | -8.46        | -32.32  | -                                           |
| 53902617            |    | -6.21         | -25.78  | -8.71        | -34.77  | -                                           |
| 53343542            |   | -6.43         | -24.29  | -8.28        | -31.15  | -                                           |
| 25165620            |  | -6.51         | -24.04  | -9.61        | -44.41  | Rac GTPases inhibitors [12]                 |

Table S1. Cont.

| Berberine Analogues |                                                                                     |               |         |              |         | Anticancer Activity and if Available Target |
|---------------------|-------------------------------------------------------------------------------------|---------------|---------|--------------|---------|---------------------------------------------|
| CID ID              | 2D Chemical Structure                                                               | <i>h-telo</i> |         | <i>c-myc</i> |         |                                             |
|                     |                                                                                     | G-Score       | MM/GBSA | G-Score      | MM/GBSA |                                             |
| 53343544            | 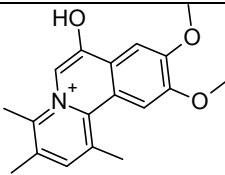   | -6.13         | -23.84  | -8.29        | -28.59  | -                                           |
| Natural Alkaloids   |                                                                                     |               |         |              |         | Anticancer Activity and if Available Target |
| CID                 | 2D Chemical structure                                                               | <i>h-telo</i> |         | <i>c-myc</i> |         |                                             |
|                     |                                                                                     | G-Score       | MM/GBSA | G-Score      | MM/GBSA |                                             |
| 53318152 *          |    | -6.29         | -38.57  | -8.07        | -31.44  | Antitumor [16]                              |
| 24828402            |   | -6.10         | -32.94  | -8.30        | -35.15  | -                                           |
| 25258753            |  | -6.84         | -32.57  | -8.33        | -44.26  | Antitumor [17]                              |

Table S1. Cont.

| Berberine Analogues |                                                                                     |               |         |              |         | Anticancer Activity and if Available Target |
|---------------------|-------------------------------------------------------------------------------------|---------------|---------|--------------|---------|---------------------------------------------|
| CID ID              | 2D Chemical Structure                                                               | <i>h-telo</i> |         | <i>c-myc</i> |         |                                             |
|                     |                                                                                     | G-Score       | MM/GBSA | G-Score      | MM/GBSA |                                             |
| 24951900            | 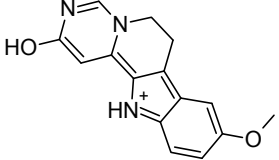   | -8.21         | -30.34  | -8.03        | -39.19  | -                                           |
| 10890876            |    | -6.76         | -30.09  | -8.17        | -31.69  | -                                           |
| 12443570            |    | -6.48         | -29.45  | -8.09        | -34.28  | -                                           |
| 20472807            |   | -6.38         | -29.33  | -8.31        | -32.93  | -                                           |
| 53322103            |  | -6.22         | -29.27  | -8.15        | -30.19  | Antitumor [16,18]                           |
| 49801392            |  | -6.31         | -28.76  | -8.17        | -29.81  | Antitumor [19]                              |

Table S1. Cont.

| Berberine Analogues |                                                                                     |               |         |              |         | Anticancer Activity and if Available Target |
|---------------------|-------------------------------------------------------------------------------------|---------------|---------|--------------|---------|---------------------------------------------|
| CID ID              | 2D Chemical Structure                                                               | <i>h-telo</i> |         | <i>c-myc</i> |         |                                             |
|                     |                                                                                     | G-Score       | MM/GBSA | G-Score      | MM/GBSA |                                             |
| 5137933             | 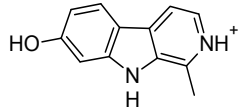   | -6.83         | -27.37  | -8.21        | -32.46  | Antitumor [5,20]                            |
| 21362738            |    | -6.10         | -27.09  | -8.57        | -31.83  | IκB kinase inhibitor [21]                   |
| 3373692             |    | -9.11         | -25.93  | -8.28        | -31.47  | -                                           |
| 54575584            |    | -6.90         | -25.78  | -10.02       | -32.15  | Haspin kinase inhibitor [22,23]             |
| 607775              |   | -7.18         | -24.11  | -8.37        | -28.53  | IKK inhibitor [24]                          |
| 5314681             |  | -6.46         | -23.95  | -8.65        | -31.72  | -                                           |

**Figure S1.** Best redocking poses and RMSd values obtained using the Glide-SP algorithm for berberine and quindoline against 3R6R (*h-telo*) and 2L7V (*c-myc*) receptors, respectively. Redocked poses are displayed as green carbon sticks, while crystallographic conformation is shown as cyan carbon sticks.

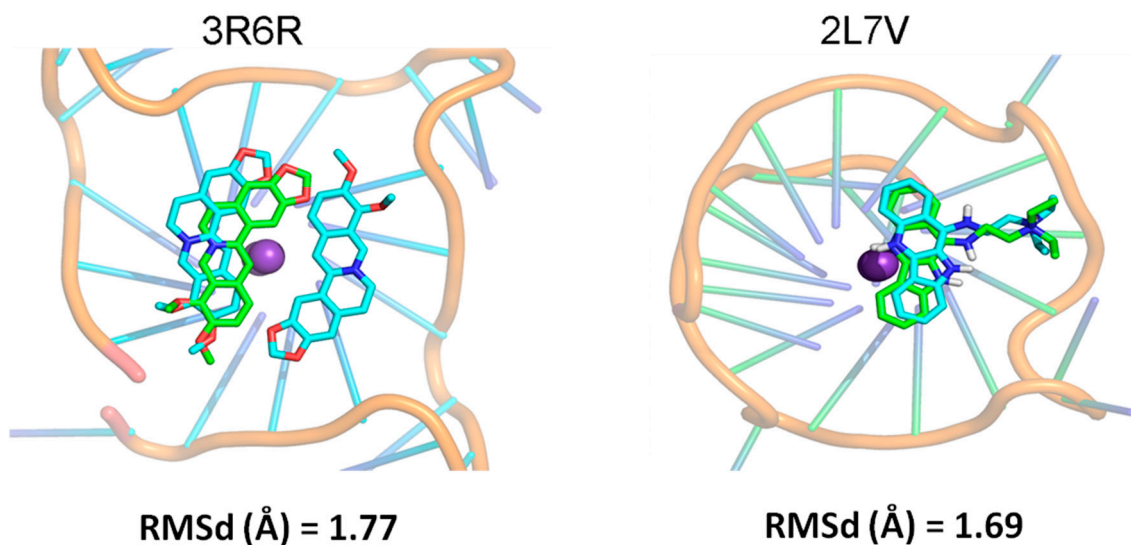

## References

1. Sawa, Y.; Ikekawa, T. 13-Substituted Palmatine Derivatives. JP50070398A, 11 June 1975.
2. Naveen Chandra, D.; Abhilash, J.; Prasanth, G.K.; Sabu, A.; Sadasivan, C.; Haridas, M. Inverted binding due to a minor structural change in berberine enhances its phospholipase A2 inhibitory effect. *Int. J. Biol. Macromol.* **2012**, *50*, 578–585.
3. Sawa, Y.; Ikekawa, T. 9-Hydroxy-10-methoxydibenzo[a,g]quinolizinium Salts. JP50148397A, 27 November 1975.
4. Beausoleil, E.; Chauvignac, C.; Taverne, T.; Lacombe, S.; Pognante, L.; Leblond, B.; Pallares, D.; De Oliveira, C.; Bachelot, F.; Carton, R.; *et al.* Structure-activity relationship of isoform selective inhibitors of Rac1/1b GTPase nucleotide binding. *Bioorg. Med. Chem. Lett.* **2009**, *19*, 5594–5598.
5. Abe, A.; Kokuba, H. Harmol induces autophagy and subsequent apoptosis in U251MG human glioma cells through the downregulation of survivin. *Oncol. Rep.* **2013**, *29*, 1333–1342.
6. Sawa, Y. Dibenzo-Shaped Clip on a to g Chinoliziniumverbindungen Square Peg, Process for Their Production and Drug-Containing. DE2520524A1, 27 November 1975.
7. Cousin, D.; Frigerio, M.; Hummersone, M.G. Fused Pentacyclic Anti-Proliferative Compounds. WO2012175991A1, 27 December 2012.
8. Hanaoka, M.; Ekimoto, H.; Kobayashi, F.; Irie, Y.; Takahashi, K.; Suzuki, M.; Nakanishi, T.; Kogawa, O.; Ishikawa, K. Process for Preparing Benzo [c] Phenanthridinium Derivatives, Novel Compounds Prepared by Said Process, and Antitumor Agents. U.S. Patent US5747502A, 5 May 1998.
9. Kumari, S.; Kaladhar, D.S. V.G. K.; Sandeep Solmon, K.; Malla, R.R.; Kishore, G. Anti-proliferative and metastatic protease inhibitory activities of protoberberines: An *in silico* and *in vitro* approaches. *Process Biochem. (Oxford, UK)* **2013**, *48*, 1565–1571.

10. Ebrahimi, M.; Khayamian, T. Interactions of G-quadruplex DNA binding site with berberine derivatives and construct a structure-based QSAR using docking descriptors. *Med. Chem. Res.* **2014**, *23*, 1327–1339.
11. Ma, Y.; Ou, T.-M.; Tan, J.-H.; Hou, J.-Q.; Huang, S.-L.; Gu, L.-Q.; Huang, Z.-S. Synthesis and evaluation of 9-*O*-substituted berberine derivatives containing aza-aromatic terminal group as highly selective telomeric G-quadruplex stabilizing ligands. *Bioorg. Med. Chem. Lett.* **2009**, *19*, 3414–3417.
12. Leblond, B.; Beausoleil, E.; Chauvignac, C.; Taverne, T.; Picard, V.; De Oliveira, C.; Schweighoffer, F. Compounds and Methods for Modulating Rho Gtpases. WO2009007457A2, 15 January 2009.
13. Olugbade, T.A.; Waigh, R.D. Synthetic benzo[*c*]phenanthridines with antileukemic activity in mice. *Pharm. Sci.* **1996**, *2*, 259–264.
14. Missirlis, E.; Karakiulakis, G.; Maragoudakis, M.E. Antitumor effect of GPA1734 in rat Walker 256 carcinoma. *Investig. New Drugs* **1990**, *8*, 145–147.
15. Bernardo, P.H.; Wan, K.-F.; Sivaraman, T.; Xu, J.; Moore, F.K.; Hung, A.W.; Mok, H.Y.K.; Yu, V.C.; Chai, C.L.L. Structure-Activity Relationship Studies of Phenanthridine-Based Bcl-XL Inhibitors. *J. Med. Chem.* **2008**, *51*, 6699–6710.
16. Frederick, R.; Masereel, B.; Reniers, J.; Wouters, J.; Bruyere, C.; Kiss, R. Beta Carboline Derivatives Useful in the Treatment of Proliferative Disorders. WO2011161256A1, 29 December 2011.
17. Desmaeele, D.; Auclair, C.; Zouhiri, F.; Polard, V.; Maksimenko, A. Dimers of Harmol or of Its Derivatives and Uses Thereof. EP2050747A1, 22 April 2009.
18. Frederick, R.; Bruyere, C.; Vancraeynest, C.; Reniers, J.; Meinguet, C.; Pochet, L.; Backlund, A.; Masereel, B.; Kiss, R.; Wouters, J. Novel Trisubstituted Harmine Derivatives with Original in Vitro Anticancer Activity. *J. Med. Chem.* **2012**, *55*, 6489–6501.
19. Buolamwini, J.K. 1-Aryl or 1- Heteroaryl-Pyrido(B)indoles and Uses Thereof. U.S. Patent US20130131070A1, 23 May 2013.
20. Yu, L.; Hu, L.; Tang, L.; Liu, J.; Liu, Z. Application of Harmol to Manufacture of Antitumor Agents. CN103417536A, 4 December 2013.
21. Ritzeler, O.; Castro, A.; Grenier, L.; Soucy, F.; Hancock, W.W.; Mazdiyasi, H.; Palombella, V.; Adams, J. Substituted Beta-Carbolines. EP1209158A1, 29 May 2002.
22. Cuny, G.D.; Ulyanova, N.P.; Patnaik, D.; Liu, J.-F.; Lin, X.; Auerbach, K.; Ray, S.S.; Xian, J.; Glicksman, M.A.; Stein, R.L.; *et al.* Structure-activity relationship study of beta-carboline derivatives as haspin kinase inhibitors. *Bioorg. Med. Chem. Lett.* **2012**, *22*, 2015–2019.
23. Higgins, J.; Patnaik, D.; Ulyanova, N.; Stein, R.L.; Xian, J.; Glicksman, M.; Cuny, G.D. Beta-Carbolines as Inhibitors of Haspin and DYRK Kinases and Their Preparation, Pharmaceutical Compositions and Use in the Treatment of Diseases. WO2011133795A2, 27 October 2011.
24. Castro, A.C.; Dang, L.C.; Soucy, F.; Grenier, L.; Mazdiyasi, H.; Hottelet, M.; Parent, L.; Pien, C.; Palombella, V.; Adams, J. Novel IKK inhibitors:  $\beta$ -carbolines. *Bioorg. Med. Chem. Lett.* **2003**, *13*, 2419–2422.
